# Supplementary material for: Association of Time-of-Day Energy Intake Patterns with Nutrient Intakes, Diet Quality, and Insulin Resistance
Source: PubMed Central journal article supplement (PMC7996289; doi:10.3390/nu13030725), 2021-02-25
Supplement: nutrients-13-00725-s001.pdf [file nutrients-13-00725-s001.pdf]

**Supplementary Materials:**

**Table S1:** Sociodemographic characteristics, lifestyles, eating pattern profile, and cardiometabolic risk factors of the overall participants

| Variables                                       | Mean (SD) %  |
|-------------------------------------------------|--------------|
| Sociodemographic characteristics and lifestyles |              |
| Age (y, mean (SD))                              | 50.36(14.22) |
| Gender                                          |              |
| Man                                             | 3913 (44.84) |
| Woman                                           | 4813 (55.16) |
| Education level (%)                             |              |
| Very low                                        | 2510 (28.76) |
| Low                                             | 3005 (34.44) |
| Medium                                          | 1970 (22.58) |
| High                                            | 1241 (14.22) |
| Geographic region (%)                           |              |
| City                                            | 1710 (19.60) |
| Suburban                                        | 1493 (17.11) |
| Town or county                                  | 1476 (16.91) |
| Rural village                                   | 4047 (46.38) |
| Physical activity (%)                           |              |
| Light                                           | 2317 (26.55) |
| Medium                                          | 3087 (35.38) |
| Heavy                                           | 3322 (38.07) |
| Sleep duration (%)                              |              |
| Normal                                          | 6971(79.89)  |
| Short                                           | 220(2.52)    |
| Long                                            | 1535(17.59)  |
| Smoking (%)                                     |              |
| Nonsmoker                                       | 6472 (74.17) |
| Ex-smoker                                       | 189 (2.17)   |
| Current smoker                                  | 2065 (23.66) |
| Alcohol drinking (%)                            |              |
| Nondrinker                                      | 6274 (71.90) |
| Drink less than 1 time/month                    | 460 (5.27)   |
| Drink 1-2 times/month                           | 560 (6.42)   |
| Drink 1-4 times/week                            | 792 (9.08)   |
| Drink everyday                                  | 640 (7.33)   |
| Per capita household income                     |              |
| Low                                             | 5252 (60.19) |
| Medium                                          | 3252 (37.27) |
| High                                            | 222 (2.54)   |
| Urbanicity (mean (SD))                          | 71.81(17.55) |

| Eating pattern profile                           |               |
|--------------------------------------------------|---------------|
| EI% from Meals (mean (SD))                       | 96.98(5.52)   |
| EI% from Snacks (mean (SD))                      | 3.02(5.52)    |
| Cardiometabolic risk factors                     |               |
| BMI (mg/kg, mean (SD))                           | 23.78(3.61)   |
| SBP (mmHg, mean (SD))                            | 124.15(16.89) |
| DBP (mmHg, mean (SD))                            | 79.65(10.33)  |
| TC (mmol/L, mean (SD))                           | 4.89(1.05)    |
| TG (log mmol/L, mean (SD))                       | 0.16(0.58)    |
| LDL_C (mmol/L, mean (SD))                        | 3.09(0.89)    |
| HDL_C (mmol/L, mean (SD))                        | 1.29(0.33)    |
| Glucose (log mmol/L, mean (SD)) <sup>1</sup>     | 1.65(0.18)    |
| Insulin (log $\mu$ U/mL, mean (SD)) <sup>1</sup> | 1.77(0.64)    |
| HOMA-IR (log mean (SD)) <sup>1</sup>             | 0.30(0.71)    |

---

<sup>1</sup>Log-transformation was conducted to improve normality. SD, standard deviation; BMI, body mass index; SBP, systolic blood pressure; DBP, diastolic blood pressure; TC, total cholesterol; TG, plasma total triglycerides; HDL\_C, high-density lipoprotein cholesterol; LDL\_C, low-density lipoprotein cholesterol; HOMA-IR, insulin resistance assessed by homeostasis model.

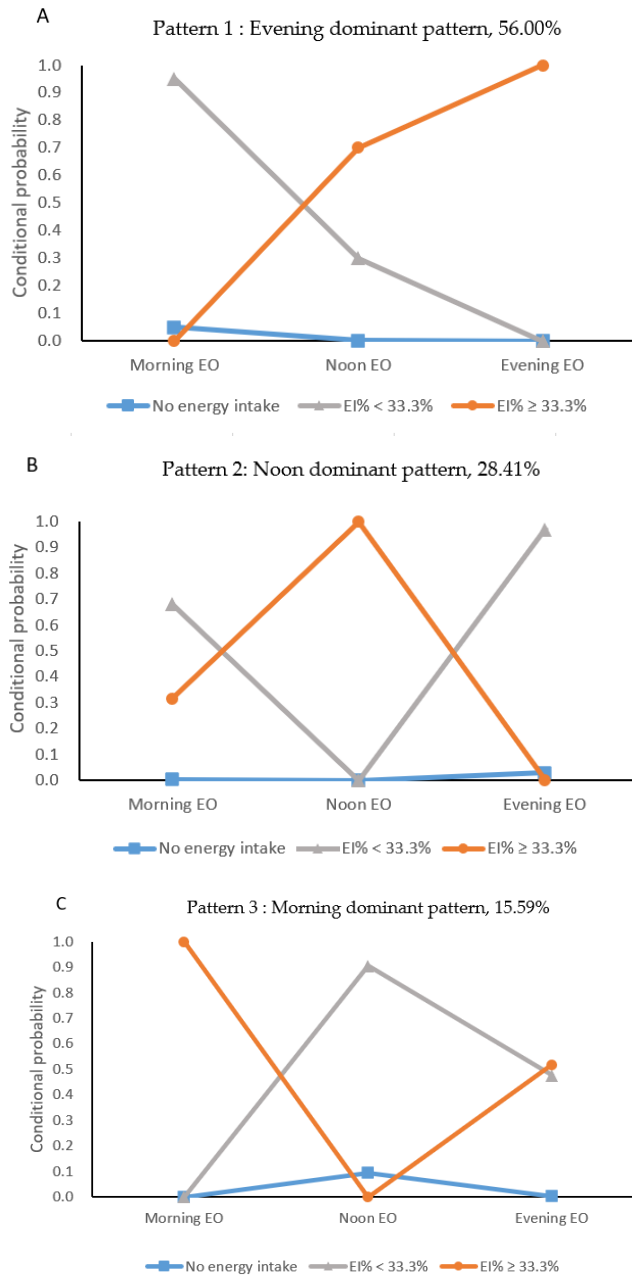

**Figure 1.** Conditional probability of proportion of energy intake across EOs in a day by latent class membership in Chinese adults. (A) “Noon dominant pattern”; (B) “Evening dominant pattern”; (C) “Morning dominant pattern”. EI% < 33.3% indicates energy contributed less than 33.3% total energy intake; EI% ≥ 33.3% indicates energy contributed more than or equal to 33.3% total energy intake.
